# Supplementary material
Source: PubMed Central journal article supplement (PMC8011353)
Supplement: NIHMS1678508-supplement-Supplementary_figure-1.pdf [file NIHMS1678508-supplement-Supplementary_figure-1.pdf]

**A**

Day shift only

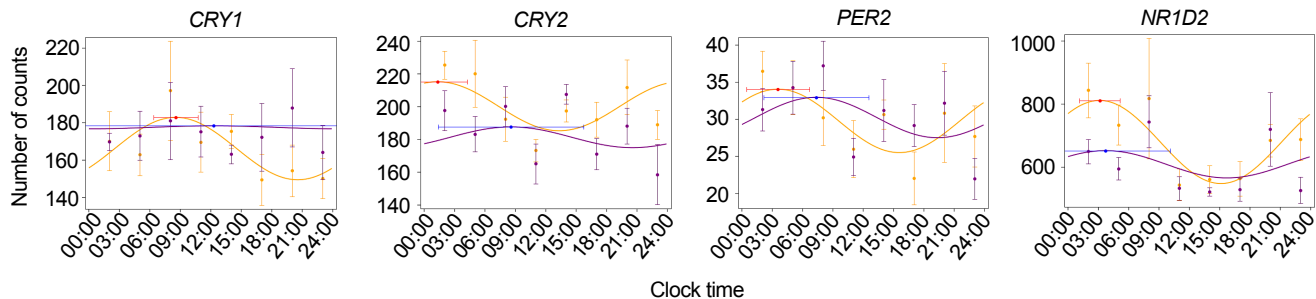**B**

Night shift only

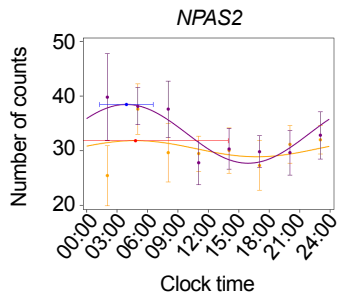**C**

Both shifts

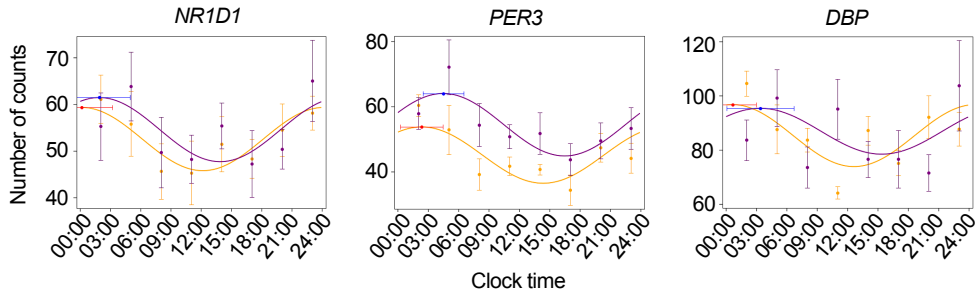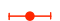Day shift timing of peak  $\pm$  95% CI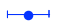Night shift timing of peak  $\pm$  95% CI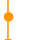Day shift mean  $\pm$  SE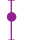Night shift mean  $\pm$  SE

— Cosinor fit
