# Supplementary material
Source: PubMed Central journal article supplement (PMC8011353)

**A**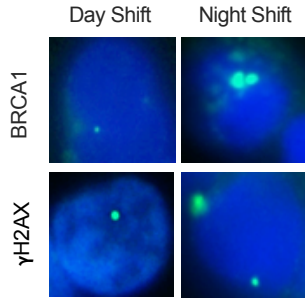**B**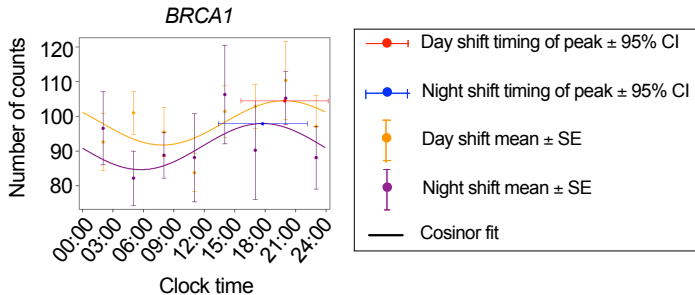

Supplement: NIHMS1678508-supplement-Supplementary_figure-2.pdf [file NIHMS1678508-supplement-Supplementary_figure-2.pdf]

**A**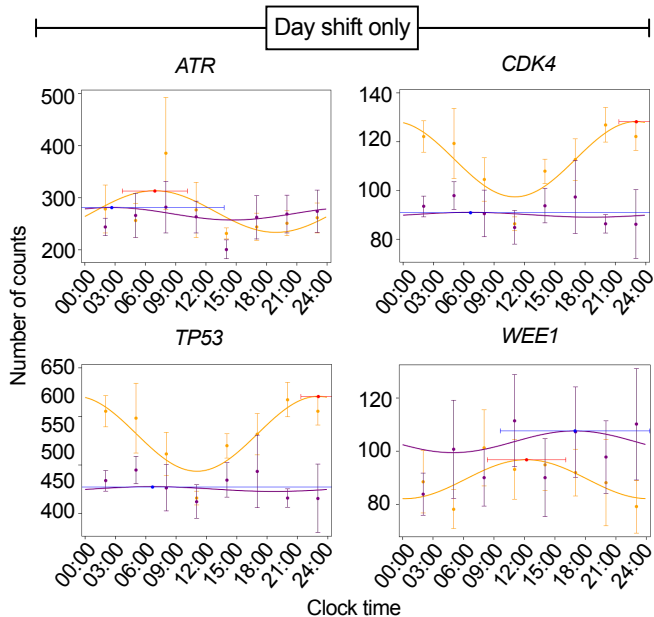**B**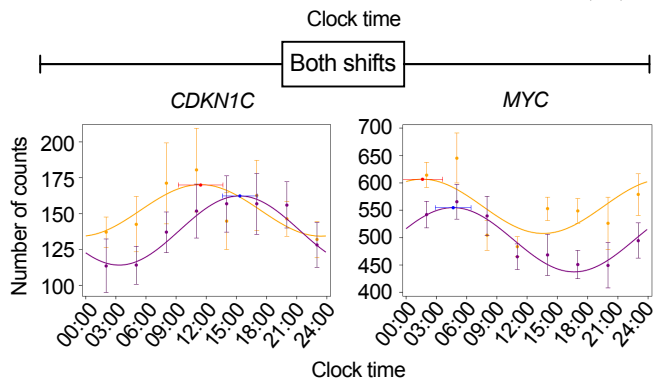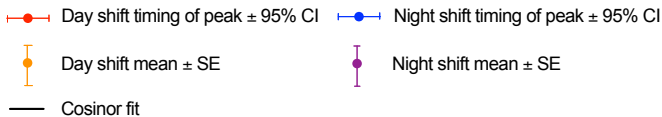

Supplement: NIHMS1678508-supplement-Supplementary_figure-3.pdf [file NIHMS1678508-supplement-Supplementary_figure-3.pdf]
